# Supplementary material for: One-step modified method for a highly efficient Au–PANI@TiO2visible-light photocatalyst
Source: Royal Society of Chemistry journal article supplement (doi:10.1039/c6nj02408d), 2016-01-01
Supplement: c6nj02408d1.pdf [file c6nj02408d1.pdf]

## Supporting Information

### One-step modified method for high efficient Au-PANI@TiO<sub>2</sub> visible-light photocatalyst

*Huan Zhang, Zhang Tao, Yinhai Tang, Mu Yang\*, Ge Wang*

Beijing Key Laboratory of Function Materials for Molecule & Structure Construction,  
School of Materials Science and Engineering, University of Science and Technology  
Beijing, Beijing 100083, People's Republic of China

\*E-mail: yangmu@ustb.edu.cn

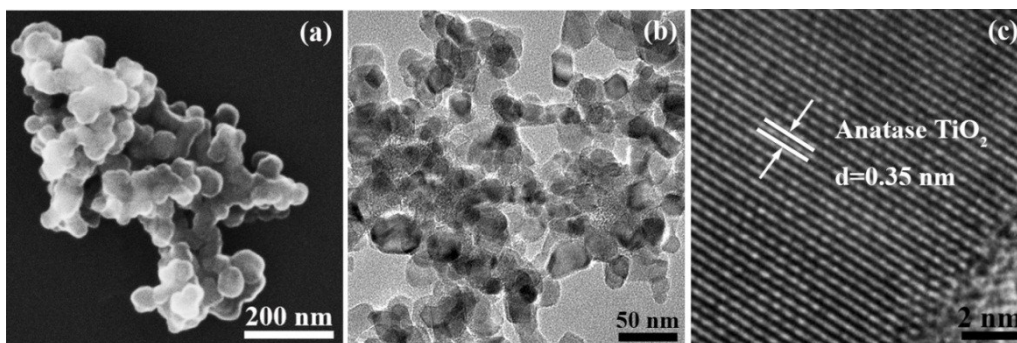

Figure S1. Morphology images of P25 NPs: (a) SEM image, (b) TEM image, (c) HRTEM image.

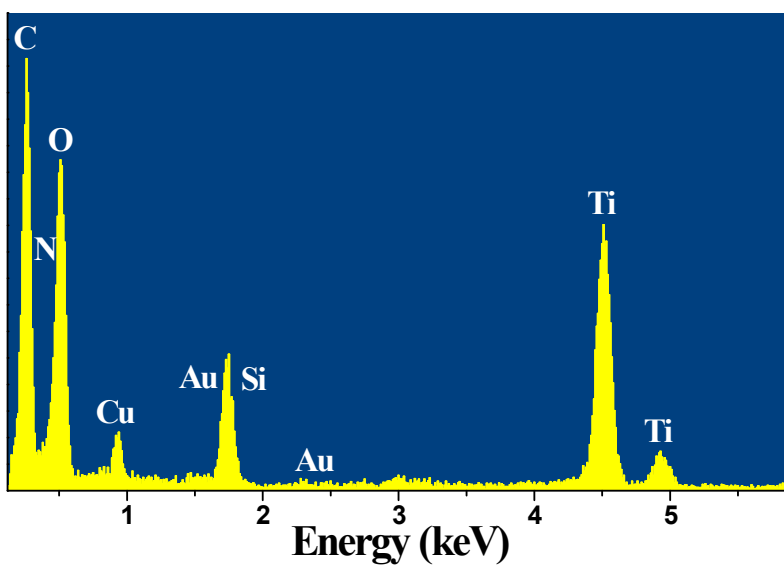

Figure S2. EDX of Au-PANI@TiO<sub>2</sub> (80:1)

Table S1. EDX elemental composition of Au-PANI@TiO<sub>2</sub> (80:1) NPs.

| Element  | Ti(K) | N(K) | Au(L) | O(K)  | C(K)  |
|----------|-------|------|-------|-------|-------|
| Weight % | 22.4  | 3.77 | 0.02  | 23.35 | 50.46 |
| Atomic % | 7.31  | 4.2  | 0.02  | 22.81 | 65.66 |

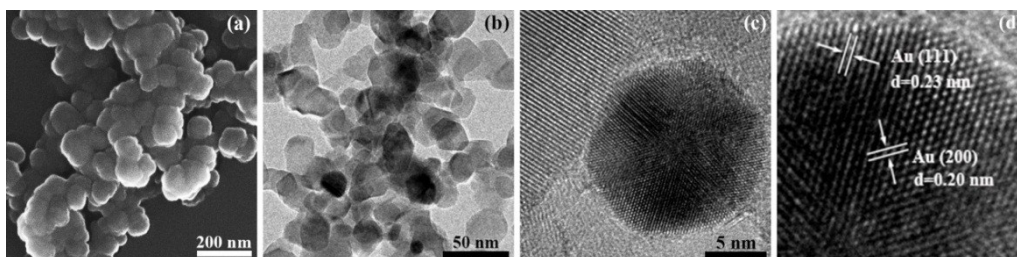

Figure S3. Morphology images of Au@TiO<sub>2</sub> NPs: (a) SEM image, (b) TEM image, (c) and (d) HRTEM images.

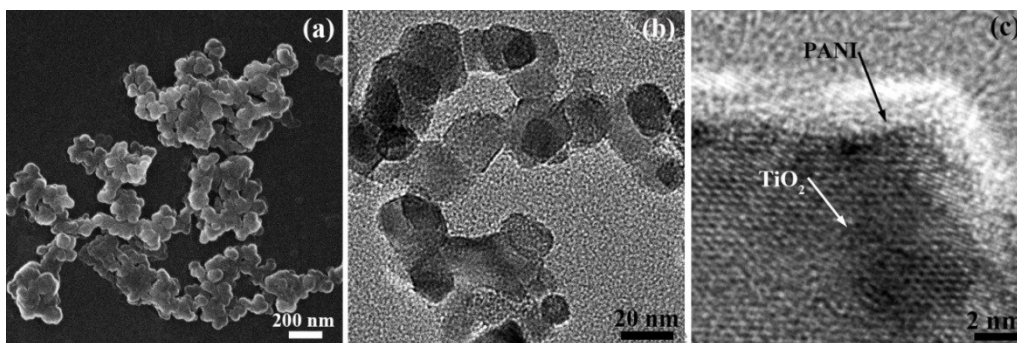

Figure S4. Morphology images of PANI@TiO<sub>2</sub> (80:1): (a) SEM image, (b) TEM image, (c) HRTEM image.

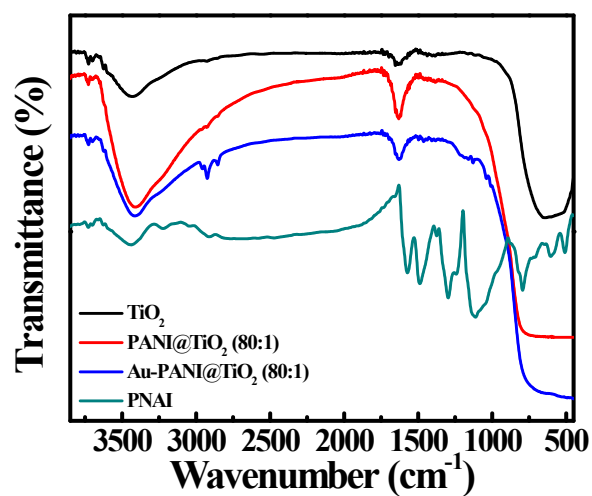

Figure S5. FT-IR spectra of TiO<sub>2</sub>, PANI, PANI@TiO<sub>2</sub> (80:1) and Au-PANI@TiO<sub>2</sub> (80:1).

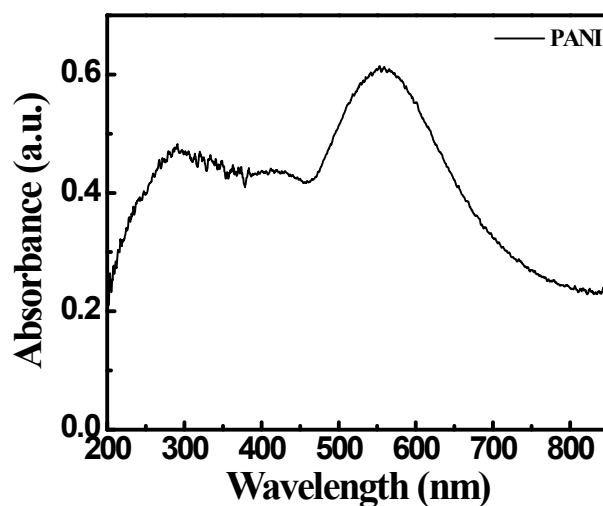

Figure S6. UV-vis diffuse reflectance spectra of PANI.

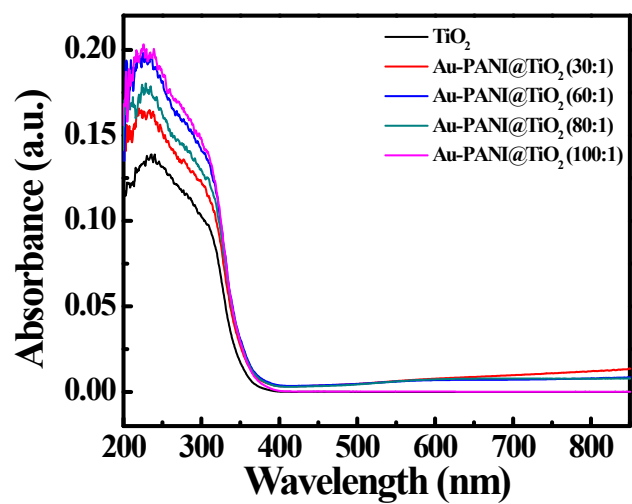

Figure S7. UV-vis diffuse reflectance spectra of TiO<sub>2</sub>, Au-PANI@TiO<sub>2</sub> (30:1), Au-PANI@TiO<sub>2</sub> (60:1), Au-PANI@TiO<sub>2</sub> (80:1) and Au-PANI@TiO<sub>2</sub> (100:1) samples
